# Supplementary material
Source: HighWire-hosted journal article supplement (https://www.annfammed.org/highwire/filestream/26708/field_highwire_adjunct_files/0/Munroe_Supp_Tables_1-5.pdf)
Supplement: Munroe_Supp_Tables_1-5.pdf [file Munroe_Supp_Tables_1-5.pdf]

Supplemental materials for

*Ann Fam Med* 2024;23:p-p. <https://doi.org/10.1370/afm.240061>

## *Impact of Financial Incentives and Department Size on Scholarly Activity Output*

*Dominique D. Munroe, MD, MPH<sup>1</sup>*

*Jose Villalon-Gomez, MD, MPH<sup>1</sup>*

*Dean A. Seehusen, MD, MPH<sup>2</sup>*

*Miranda A. Moore, PhD<sup>1,3</sup>*

<sup>1</sup>*Department of Family and Preventive Medicine, Emory University, Atlanta, Georgia*

<sup>2</sup>*Department of Family and Community Medicine, Medical College of Georgia, Augusta University, Augusta, Georgia*

<sup>3</sup>*Department of Medicine, Emory University, Atlanta, Georgia*

| <b>Supplemental Table 1. Distribution of characteristics of family medicine residency programs surveyed.</b> |                                 |                     |                                                   |                     |
|--------------------------------------------------------------------------------------------------------------|---------------------------------|---------------------|---------------------------------------------------|---------------------|
| <b>Variable</b>                                                                                              | <b>Full Sample<br/>(N= 195)</b> |                     | <b>Interviewing<br/>Module Sample<br/>(N=106)</b> |                     |
|                                                                                                              | <b>N<br/>(SD)</b>               | <b>Mean<br/>(%)</b> | <b>N<br/>(SD)</b>                                 | <b>Mean<br/>(%)</b> |
| <b>DC Gender</b>                                                                                             |                                 |                     |                                                   |                     |
| Female/Woman                                                                                                 | 71                              | 36.41%              | 39                                                | 36.80%              |
| Male/Man                                                                                                     | 123                             | 63.08%              | 67                                                | 63.20%              |
| No Response                                                                                                  | 1                               | 0.51%               | 0                                                 | 0.00%               |
| <b>DC Race</b>                                                                                               |                                 |                     |                                                   |                     |
| American Indian/Alaska Native/Indigenous                                                                     | 1                               | 0.51%               | 1                                                 | 0.90%               |
| Asian                                                                                                        | 15                              | 7.69%               | 6                                                 | 5.70%               |
| Black or African American                                                                                    | 21                              | 10.77%              | 10                                                | 9.40%               |
| Hispanic/Latino/of Spanish Origin                                                                            | 8                               | 4.10%               | 5                                                 | 4.70%               |
| Middle Eastern/North African                                                                                 | 0                               | 0.00%               | 0                                                 | 0.00%               |
| Native Hawaiian/other Pacific Islander                                                                       | 1                               | 0.51%               | 1                                                 | 0.90%               |
| White                                                                                                        | 147                             | 75.38%              | 83                                                | 78.30%              |
| Choose not to disclose                                                                                       | 9                               | 4.62%               | 0                                                 | 0.00%               |
| No Response                                                                                                  | 2                               | 1.03%               | 2                                                 | 1.90%               |
| <b>DC Age</b>                                                                                                |                                 |                     |                                                   |                     |
| 20 - 29 years old                                                                                            | 0                               | 0.00%               | 0                                                 | 0.00%               |
| 30 - 39 years old                                                                                            | 2                               | 1.03%               | 1                                                 | 0.90%               |
| 40 - 49 years old                                                                                            | 37                              | 18.97%              | 19                                                | 17.90%              |
| 50 - 59 years old                                                                                            | 66                              | 33.85%              | 38                                                | 35.80%              |
| 60 - 69 years old                                                                                            | 79                              | 40.51%              | 40                                                | 37.70%              |
| 70+ years old                                                                                                | 10                              | 5.13%               | 8                                                 | 7.50%               |
| No Response                                                                                                  | 1                               | 0.51%               | 0                                                 | 0.00%               |

| <b>In what state is your department located?</b>                                                                                                                                    |    |        |    |        |
|-------------------------------------------------------------------------------------------------------------------------------------------------------------------------------------|----|--------|----|--------|
| New England (NH, MA, ME, VT, RI, or CT)                                                                                                                                             | 12 | 6.15%  | 7  | 6.60%  |
| Middle Atlantic (NY, PA, or NJ)                                                                                                                                                     | 30 | 15.38% | 18 | 17.00% |
| South Atlantic (PR, FL, GA, SC, NC, VA, DC, WV, DE, or MD)                                                                                                                          | 37 | 18.97% | 17 | 16.00% |
| East South Central (KY, TN, MS, or AL)                                                                                                                                              | 11 | 5.64%  | 6  | 5.70%  |
| East North Central (WI, MI, OH, IN, or IL)                                                                                                                                          | 29 | 14.87% | 18 | 17.00% |
| West South Central (OK, AR, LA, or TX)                                                                                                                                              | 21 | 10.77% | 8  | 7.50%  |
| West North Central (ND, MN, SD, IA, NE, KS, or MO)                                                                                                                                  | 15 | 7.69%  | 10 | 9.40%  |
| Mountain (MT, ID, WY, NV, UT, AZ, CO, or NM)                                                                                                                                        | 11 | 5.64%  | 8  | 7.50%  |
| Pacific (WA, OR, CA, AK, or HI)                                                                                                                                                     | 18 | 9.23%  | 9  | 8.50%  |
| Canada                                                                                                                                                                              | 11 | 5.64%  | 5  | 4.70%  |
| Source: Analysis of the Fall 2022 Council of Academic Family Medicine Educational Research Alliance Family Medicine Department Chairs. SD: standard deviation; DC: Department Chair |    |        |    |        |

**Supplemental Table 2. Distribution of characteristics of family medicine department chairs surveyed on engagement in scholarly activity (N=106).**

| Variable                                           | All<br>(N=106) |             | Department Chair Did<br>Engage in Scholarly<br>Activity<br>(N=89) |             | Department Chair Did<br>Not Engage in<br>Scholarly Activity<br>(N=17) |             |
|----------------------------------------------------|----------------|-------------|-------------------------------------------------------------------|-------------|-----------------------------------------------------------------------|-------------|
|                                                    | N<br>(SD)      | Mean<br>(%) | N<br>(SD)                                                         | Mean<br>(%) | N<br>(SD)                                                             | Mean<br>(%) |
| <b>Type of Residency Program</b>                   |                |             |                                                                   |             |                                                                       |             |
| Medical School - Based / Medical School Affiliated | 83             | 78.3%       | 71                                                                | 79.8%       | 12                                                                    | 70.6%       |
| Non Medical School Affiliated                      | 4              | 3.8%        | 4                                                                 | 4.5%        | 0                                                                     | 0.0%        |
| Other (Don't have a residency / Other/Unknown)     | 19             | 17.9%       | 14                                                                | 15.7%       | 5                                                                     | 29.4%       |
| <b>Residency Program Location</b>                  |                |             |                                                                   |             |                                                                       |             |
| New England                                        | 7              | 6.6%        | 5                                                                 | 5.6%        | 2                                                                     | 11.8%       |
| Middle Atlantic                                    | 18             | 17.0%       | 15                                                                | 16.9%       | 3                                                                     | 17.6%       |
| South Atlantic                                     | 17             | 16.0%       | 15                                                                | 16.9%       | 2                                                                     | 11.8%       |
| East South Central                                 | 6              | 5.7%        | 6                                                                 | 6.7%        | 0                                                                     | 0.0%        |
| East North Central                                 | 18             | 17.0%       | 14                                                                | 15.7%       | 4                                                                     | 23.5%       |
| West South Central                                 | 8              | 7.5%        | 7                                                                 | 7.9%        | 1                                                                     | 5.9%        |
| West North Central                                 | 10             | 9.4%        | 8                                                                 | 9.0%        | 2                                                                     | 11.8%       |
| Mountain                                           | 8              | 7.5%        | 8                                                                 | 9.0%        | 0                                                                     | 0.0%        |
| Pacific                                            | 9              | 8.5%        | 7                                                                 | 7.9%        | 2                                                                     | 11.8%       |
| Canada                                             | 5              | 4.7%        | 4                                                                 | 4.5%        | 1                                                                     | 5.9%        |
| <b>Community Size</b>                              |                |             |                                                                   |             |                                                                       |             |

|                                                                                    |                 |       |                  |       |                  |       |
|------------------------------------------------------------------------------------|-----------------|-------|------------------|-------|------------------|-------|
| Less than 30,000                                                                   | 5               | 4.7%  | 5                | 5.6%  | 0                | 0.0%  |
| 30,000 to 74,999                                                                   | 4               | 3.8%  | 2                | 2.2%  | 2                | 11.8% |
| 75,000 to 149,000                                                                  | 14              | 13.2% | 11               | 12.4% | 3                | 17.6% |
| 150,000 to 499,999                                                                 | 27              | 25.5% | 24               | 27.0% | 3                | 17.6% |
| 500,000 to 1 million                                                               | 20              | 18.9% | 17               | 19.1% | 3                | 17.6% |
| More than 1 million                                                                | 36              | 34.0% | 30               | 33.7% | 6                | 35.3% |
| Unknown                                                                            | 0               | 0.0%  | 0                | 0.0%  | 0                | 0.0%  |
| <b>DC Current Tenure</b>                                                           | 5.44(4)[0-27]   |       | 5.39 (4)[0-27]   |       | 5.73(4)[0-26]    |       |
| <b>DC Total Tenure</b>                                                             | 6.62(5)[0-30]   |       | 6.59(5)[0-30]    |       | 6.78(5.25)[0-26] |       |
| <b>Department full-time FTEs (MD, DO, PhD, PharmD, and other types of faculty)</b> | 37.4(20)[0-250] |       | 37.03(20)[1-250] |       | 39.51(18)[0-200] |       |
| <b>DC Gender</b>                                                                   |                 |       |                  |       |                  |       |
| Female                                                                             | 39              | 36.8% | 33               | 37.1% | 6                | 35.3% |
| Male                                                                               | 67              | 63.2% | 56               | 62.9% | 11               | 64.7% |
| Other/Non-Binary                                                                   | 0               | 0.0%  | 0                | 0.0%  | 0                | 0.0%  |
| Other/ Chose not to Disclose                                                       | 0               | 0.0%  | 0                | 0.0%  | 0                | 0.0%  |
| <b>DC URiM</b>                                                                     |                 |       |                  |       |                  |       |
| NO                                                                                 | 92              | 86.8% | 77               | 86.5% | 15               | 88.2% |
| YES                                                                                | 14              | 13.2% | 12               | 13.5% | 2                | 11.8% |
| Missing                                                                            | 0               | 0.0%  | 0                | 0.0%  | 0                | 0.0%  |
| <b>DC RACE</b>                                                                     |                 |       |                  |       |                  |       |
| American Indian or Alaska Native                                                   | 1               | 0.9%  | 1                | 1.1%  | 0                | 0.0%  |
| Asian                                                                              | 6               | 5.7%  | 5                | 5.6%  | 1                | 5.9%  |
| Black or African-American                                                          | 10              | 9.4%  | 10               | 11.2% | 0                | 0.0%  |
| Hispanic                                                                           | 5               | 4.7%  | 4                | 4.5%  | 1                | 5.9%  |
| Middle Eastern                                                                     | 0               | 0.0%  | 0                | 0.0%  | 0                | 0.0%  |
| Native Hawaiian or Pacific Islander                                                | 1               | 0.9%  | 1                | 1.1%  | 0                | 0.0%  |
| White                                                                              | 83              | 78.3% | 69               | 77.5% | 14               | 82.4% |
| Unknown                                                                            | 2               | 1.9%  | 1                | 1.1%  | 1                | 5.9%  |
| <b>DC Age</b>                                                                      |                 |       |                  |       |                  |       |
| 20-29                                                                              | 0               | 0.0%  | 0                | 0.0%  | 0                | 0.0%  |
| 30-39                                                                              | 1               | 0.9%  | 1                | 1.1%  | 0                | 0.0%  |
| 40-49                                                                              | 19              | 17.9% | 16               | 18.0% | 3                | 17.6% |
| 50-59                                                                              | 38              | 35.8% | 35               | 39.3% | 3                | 17.6% |
| 60-69                                                                              | 40              | 37.7% | 31               | 34.8% | 9                | 52.9% |
| 70+                                                                                | 8               | 7.5%  | 6                | 6.7%  | 2                | 11.8% |
| Age Unknown                                                                        | 0               | 0.0%  | 0                | 0.0%  | 0                | 0.0%  |
| <b>Department has a family medicine clerkship</b>                                  |                 |       |                  |       |                  |       |
| Yes                                                                                | 96              | 90.6% | 81               | 91.0% | 15               | 88.2% |

|         |    |      |   |      |   |       |
|---------|----|------|---|------|---|-------|
| No      | 10 | 9.4% | 8 | 9.0% | 2 | 11.8% |
| Missing | 0  | 0.0% | 0 | 0.0% | 0 | 0.0%  |

Source: Analysis of the Fall 2022 Council of Academic Family Medicine Educational Research Alliance Family Medicine Residency Directors Survey. SD: Standard Deviation; DC: Department Chair; FTE: Full Time Equivalent; URiM: underrepresented in medicine

**Supplemental Table 3. Faculty scholarly activity versus FTE size.**

| Variable                                                                                                                                        | All<br>(N =106) |              | Department<br>Chairs with FTE<br><25<br>(N=60) |              | Department<br>Chairs with<br>FTE between<br>25-75<br>(N=30) |              | Department<br>Chairs with<br>FTE > 75<br>(N=16) |              |
|-------------------------------------------------------------------------------------------------------------------------------------------------|-----------------|--------------|------------------------------------------------|--------------|-------------------------------------------------------------|--------------|-------------------------------------------------|--------------|
|                                                                                                                                                 | N               | Mean<br>(SD) | N                                              | Mean<br>(SD) | N                                                           | Mean<br>(SD) | N                                               | Mean<br>(SD) |
| <i>In the 2021-2022 academic year, how many of the following scholarly activities did your clinical based family medicine faculty complete:</i> |                 |              |                                                |              |                                                             |              |                                                 |              |
| <b>Poster or oral abstract presentation at an academic conference (local, regional, or national)</b>                                            |                 |              |                                                |              |                                                             |              |                                                 |              |
| 0                                                                                                                                               | 5               | 4.7%         | 5                                              | 8.3%         | 0                                                           | 0.0%         | 0                                               | 0.0%         |
| 1 to 5                                                                                                                                          | 47              | 44.3%        | 32                                             | 53.3%        | 14                                                          | 46.7%        | 1                                               | 6.3%         |
| 6 +                                                                                                                                             | 53              | 50.0%        | 23                                             | 38.3%        | 15                                                          | 51.7%        | 15                                              | 93.8%        |
| Missing                                                                                                                                         | 1               | 0.9%         | 0                                              | 0.0%         | 1                                                           | 3.3%         | 0                                               | 0.0%         |
| <b>PubMed indexed peer-review original research article published</b>                                                                           |                 |              |                                                |              |                                                             |              |                                                 |              |
| 0                                                                                                                                               | 10              | 9.4%         | 8                                              | 13.3%        | 2                                                           | 6.7%         | 0                                               | 0.0%         |
| 1 to 5                                                                                                                                          | 54              | 50.9%        | 34                                             | 56.7%        | 16                                                          | 53.3%        | 4                                               | 25.0%        |
| 6 +                                                                                                                                             | 42              | 39.6%        | 18                                             | 30.0%        | 12                                                          | 40.0%        | 12                                              | 75.0%        |
| Missing                                                                                                                                         | 0               | 0.0%         | 0                                              | 0.0%         | 0                                                           | 0.0%         | 0                                               | 0.0%         |
| <b>Editorial or commentary article published</b>                                                                                                |                 |              |                                                |              |                                                             |              |                                                 |              |

|                                                                                                                                                                                                        |    |       |    |       |    |       |    |       |
|--------------------------------------------------------------------------------------------------------------------------------------------------------------------------------------------------------|----|-------|----|-------|----|-------|----|-------|
| 0                                                                                                                                                                                                      | 27 | 25.5% | 20 | 33.3% | 6  | 20.0% | 1  | 6.3%  |
| 1 to 5                                                                                                                                                                                                 | 60 | 56.6% | 33 | 55.0% | 20 | 66.7% | 7  | 43.8% |
| 6 +                                                                                                                                                                                                    | 14 | 13.2% | 5  | 8.3%  | 2  | 6.7%  | 7  | 43.8% |
| Missing                                                                                                                                                                                                | 5  | 4.7%  | 2  | 3.3%  | 2  | 6.7%  | 1  | 6.3%  |
| <b>Clinical review articles published</b>                                                                                                                                                              |    |       |    |       |    |       |    |       |
| 0                                                                                                                                                                                                      | 37 | 34.9% | 29 | 48.3% | 6  | 20.0% | 2  | 12.5% |
| 1 to 5                                                                                                                                                                                                 | 44 | 41.5% | 24 | 40.0% | 17 | 56.7% | 3  | 18.8% |
| 6 +                                                                                                                                                                                                    | 22 | 20.8% | 6  | 10.0% | 7  | 23.3% | 9  | 56.3% |
| Missing                                                                                                                                                                                                | 3  | 2.8%  | 1  | 1.7%  | 0  | 0.0%  | 2  | 12.5% |
| <b>Other scholarly activity</b>                                                                                                                                                                        |    |       |    |       |    |       |    |       |
| 0                                                                                                                                                                                                      | 19 | 17.9% | 14 | 23.3% | 5  | 16.7% | 0  | 0.0%  |
| 1 to 5                                                                                                                                                                                                 | 24 | 22.6% | 15 | 25.0% | 7  | 23.3% | 2  | 12.5% |
| 6 +                                                                                                                                                                                                    | 43 | 40.6% | 19 | 31.7% | 14 | 46.7% | 10 | 62.5% |
| Missing                                                                                                                                                                                                | 20 | 18.9% | 12 | 20.0% | 4  | 13.3% | 4  | 25.0% |
| <b>Did you yourself produce a scholarly product in academic year 2021-2022? (Select all that apply)</b>                                                                                                |    |       |    |       |    |       |    |       |
| None                                                                                                                                                                                                   | 17 | 16.0% | 10 | 16.7% | 5  | 16.7% | 2  | 12.5% |
| Poster or oral abstract presentation at an academic conference (local, regional, or national)                                                                                                          | 51 | 48.1% | 29 | 48.3% | 13 | 43.3% | 9  | 56.3% |
| PubMed indexed peer-review original research article published                                                                                                                                         | 58 | 54.7% | 30 | 50.0% | 19 | 63.3% | 9  | 56.3% |
| Editorial or commentary article published                                                                                                                                                              | 34 | 32.1% | 17 | 28.3% | 11 | 36.7% | 6  | 37.5% |
| Clinical review articles published                                                                                                                                                                     | 16 | 15.1% | 6  | 10.0% | 7  | 23.3% | 3  | 18.8% |
| Other (please specify)                                                                                                                                                                                 | 21 | 19.8% | 11 | 18.3% | 6  | 20.0% | 0  | 25.0% |
| <b>Is a financial incentive for scholarly activities allowed at your institution?</b>                                                                                                                  |    |       |    |       |    |       |    |       |
| No                                                                                                                                                                                                     | 65 | 61.3% | 44 | 73.3% | 13 | 43.3% | 8  | 50.0% |
| Yes                                                                                                                                                                                                    | 41 | 38.7% | 16 | 26.7% | 17 | 56.7% | 8  | 50.0% |
| Missing                                                                                                                                                                                                | 0  | 0.0%  | 0  | 0.0%  | 0  | 0.0%  | 0  | 0.0%  |
| <b>What is the most significant barrier to your institution offering financial incentive for scholarly activities?</b>                                                                                 |    |       |    |       |    |       |    |       |
| Institutional governance rules directly disallow                                                                                                                                                       | 9  | 8.5%  | 4  | 6.7%  | 3  | 10.0% | 2  | 12.5% |
| Institutional budget constraints                                                                                                                                                                       | 38 | 35.8% | 26 | 43.3% | 7  | 23.3% | 5  | 31.3% |
| Department culture or tradition                                                                                                                                                                        | 11 | 10.4% | 7  | 11.7% | 3  | 10.0% | 1  | 6.3%  |
| Other                                                                                                                                                                                                  | 5  | 4.7%  | 5  | 8.3%  | 0  | 0.0%  | 0  | 0.0%  |
| Missing                                                                                                                                                                                                | 43 | 40.6% | 18 | 30.0% | 17 | 56.7% | 8  | 50.0% |
| <b>In the 2021-2022 academic year, did your clinical based FM faculty receive a cash financial incentive for engaging in scholarly activities (excluding professional meeting attendance expenses)</b> |    |       |    |       |    |       |    |       |
| No                                                                                                                                                                                                     | 22 | 20.8% | 10 | 16.7% | 7  | 23.3% | 5  | 31.3% |
| Yes a salary bonus, a set amount if any activity                                                                                                                                                       | 1  | 0.9%  | 0  | 0.0%  | 0  | 0.0%  | 1  | 6.3%  |
| Yes a salary bonus, a variable amount based on activity                                                                                                                                                | 18 | 17.0% | 6  | 10.0% | 10 | 33.3% | 2  | 12.5% |

|                                                                                                                                                                                                                         |    |       |    |       |    |       |   |       |
|-------------------------------------------------------------------------------------------------------------------------------------------------------------------------------------------------------------------------|----|-------|----|-------|----|-------|---|-------|
| Missing                                                                                                                                                                                                                 | 65 | 61.3% | 44 | 73.3% | 13 | 43.3% | 8 | 50.0% |
| <b>In the 2021-2022 academic year, did your clinical based FM faculty receive non-financial incentives for engaging in scholarly activities</b>                                                                         |    |       |    |       |    |       |   |       |
| No                                                                                                                                                                                                                      | 70 | 66.0% | 41 | 68.3% | 20 | 66.7% | 9 | 56.3% |
| Yes                                                                                                                                                                                                                     | 34 | 32.1% | 17 | 28.3% | 10 | 33.3% | 7 | 43.8% |
| Missing                                                                                                                                                                                                                 | 2  | 1.9%  | 2  | 3.3%  | 0  | 0.0%  | 0 | 0.0%  |
| <b>What is the most significant limitation your FM clinical faculty face in engaging in scholarly activities?</b>                                                                                                       |    |       |    |       |    |       |   |       |
| None                                                                                                                                                                                                                    | 3  | 2.8%  | 2  | 3.3%  | 0  | 0.0%  | 1 | 6.3%  |
| Research effort support not available                                                                                                                                                                                   | 13 | 12.3% | 10 | 16.7% | 2  | 6.7%  | 1 | 6.3%  |
| High patient care demands                                                                                                                                                                                               | 47 | 44.3% | 22 | 36.7% | 17 | 56.7% | 8 | 50.0% |
| Lack of resources(research expertise, mentoring etc.)                                                                                                                                                                   | 17 | 16.0% | 9  | 15.0% | 4  | 13.3% | 4 | 25.0% |
| Lack of interest in scholarship                                                                                                                                                                                         | 15 | 14.2% | 9  | 15.0% | 4  | 13.3% | 2 | 12.5% |
| Other                                                                                                                                                                                                                   | 8  | 7.5%  | 5  | 8.3%  | 3  | 10.0% | 0 | 0.0%  |
| Missing                                                                                                                                                                                                                 | 3  | 2.8%  | 3  | 5.0%  | 0  | 0.0%  | 0 | 0.0%  |
| Source: Analysis of the Fall 2022 Council of Academic Family Medicine Educational Research Alliance Family Medicine Residency Directors Survey. SD: Standard Deviation; DC: Department Chair; FTE: Full Time Equivalent |    |       |    |       |    |       |   |       |



**Supplemental Table 4. Faculty scholarly activity versus department chair engagement.**

| Variable                                                                                                                                        | All<br>(N=106) |             | Department<br>Chair Did<br>Engage in<br>Scholarly<br>Activity<br>(N=89) |             | Department Chair<br>Did Not Engage in<br>Scholarly Activity<br>(N=17) |             |
|-------------------------------------------------------------------------------------------------------------------------------------------------|----------------|-------------|-------------------------------------------------------------------------|-------------|-----------------------------------------------------------------------|-------------|
|                                                                                                                                                 | N<br>(SD)      | Mean<br>(%) | N<br>(SD)                                                               | Mean<br>(%) | N<br>(SD)                                                             | Mean<br>(%) |
| <i>In the 2021-2022 academic year, how many of the following scholarly activities did your clinical based family medicine faculty complete:</i> |                |             |                                                                         |             |                                                                       |             |
| <b>Poster or oral abstract presentation at an academic conference (local, regional, or national)</b>                                            |                |             |                                                                         |             |                                                                       |             |
| 0                                                                                                                                               | 5              | 4.7%        | 3                                                                       | 3.4%        | 2                                                                     | 11.8%       |
| 1 to 5                                                                                                                                          | 47             | 44.3%       | 40                                                                      | 44.9%       | 7                                                                     | 41.2%       |
| 6 +                                                                                                                                             | 53             | 50.0%       | 45                                                                      | 50.6%       | 8                                                                     | 47.1%       |
| Missing                                                                                                                                         | 1              | 0.9%        | 1                                                                       | 1.1%        | 0                                                                     | 0.0%        |
| <b>PubMed indexed peer-review original research article published</b>                                                                           |                |             |                                                                         |             |                                                                       |             |
| 0                                                                                                                                               | 10             | 9.4%        | 7                                                                       | 7.9%        | 3                                                                     | 17.6%       |
| 1 to 5                                                                                                                                          | 54             | 50.9%       | 47                                                                      | 52.8%       | 7                                                                     | 41.2%       |
| 6 +                                                                                                                                             | 42             | 39.6%       | 35                                                                      | 39.3%       | 7                                                                     | 41.2%       |
| Missing                                                                                                                                         | 0              | 0.0%        | 0                                                                       | 0.0%        | 0                                                                     | 0.0%        |
| <b>Editorial or commentary article published</b>                                                                                                |                |             |                                                                         |             |                                                                       |             |

|                                                                                                                                                                                                        |    |       |    |       |    |        |
|--------------------------------------------------------------------------------------------------------------------------------------------------------------------------------------------------------|----|-------|----|-------|----|--------|
| 0                                                                                                                                                                                                      | 27 | 25.5% | 20 | 22.5% | 7  | 41.2%  |
| 1 to 5                                                                                                                                                                                                 | 60 | 56.6% | 52 | 58.4% | 8  | 47.1%  |
| 6 +                                                                                                                                                                                                    | 14 | 13.2% | 12 | 13.5% | 2  | 11.8%  |
| Missing                                                                                                                                                                                                | 5  | 4.7%  | 5  | 5.6%  | 0  | 0.0%   |
| <b>Clinical review articles published</b>                                                                                                                                                              |    |       |    |       |    |        |
| 0                                                                                                                                                                                                      | 37 | 34.9% | 27 | 30.3% | 10 | 58.8%  |
| 1 to 5                                                                                                                                                                                                 | 44 | 41.5% | 40 | 44.9% | 4  | 23.5%  |
| 6 +                                                                                                                                                                                                    | 22 | 20.8% | 19 | 21.3% | 3  | 17.6%  |
| Missing                                                                                                                                                                                                | 3  | 2.8%  | 3  | 3.4%  | 0  | 0.0%   |
| <b>Other scholarly activity</b>                                                                                                                                                                        |    |       |    |       |    |        |
| 0                                                                                                                                                                                                      | 19 | 17.9% | 13 | 14.6% | 6  | 35.3%  |
| 1 to 5                                                                                                                                                                                                 | 24 | 22.6% | 23 | 25.8% | 1  | 5.9%   |
| 6 +                                                                                                                                                                                                    | 43 | 40.6% | 36 | 40.4% | 7  | 41.2%  |
| Missing                                                                                                                                                                                                | 20 | 18.9% | 17 | 19.1% | 3  | 17.6%  |
| <b>Did you yourself produce a scholarly product in academic year 2021-2022? (Select all that apply)</b>                                                                                                |    |       |    |       |    |        |
| None                                                                                                                                                                                                   | 17 | 15.6% | 0  | 0.0%  | 17 | 100.0% |
| Poster or oral abstract presentation at an academic conference (local, regional, or national)                                                                                                          | 51 | 46.8% | 51 | 57.3% | 0  | 0.0%   |
| PubMed indexed peer-review original research article published                                                                                                                                         | 58 | 53.2% | 58 | 65.2% | 0  | 0.0%   |
| Editorial or commentary article published                                                                                                                                                              | 34 | 31.2% | 34 | 38.2% | 0  | 0.0%   |
| Clinical review articles published                                                                                                                                                                     | 16 | 14.7% | 16 | 18.0% | 0  | 0.0%   |
| Other (please specify)                                                                                                                                                                                 | 0  | 0.0%  | 0  | 0.0%  | 0  | 0.0%   |
| <b>Is a financial incentive for scholarly activities allowed at your institution?</b>                                                                                                                  |    |       |    |       |    |        |
| No                                                                                                                                                                                                     | 65 | 61.3% | 55 | 61.8% | 10 | 58.8%  |
| Yes                                                                                                                                                                                                    | 41 | 38.7% | 34 | 38.2% | 7  | 41.2%  |
| Missing                                                                                                                                                                                                | 0  | 0.0%  | 0  | 0.0%  | 0  | 0.0%   |
| <b>What is the most significant barrier to your institution offering financial incentive for scholarly activities?</b>                                                                                 |    |       |    |       |    |        |
| Institutional governance rules directly disallow                                                                                                                                                       | 9  | 8.5%  | 9  | 10.1% | 0  | 0.0%   |
| Institutional budget constraints                                                                                                                                                                       | 38 | 35.8% | 31 | 34.8% | 7  | 41.2%  |
| Department culture or tradition                                                                                                                                                                        | 11 | 10.4% | 10 | 11.2% | 1  | 5.9%   |
| Other                                                                                                                                                                                                  | 5  | 4.7%  | 4  | 4.5%  | 1  | 5.9%   |
| Missing                                                                                                                                                                                                | 43 | 40.6% | 35 | 39.3% | 8  | 47.1%  |
| <b>In the 2021-2022 academic year, did your clinical based FM faculty receive a cash financial incentive for engaging in scholarly activities (excluding professional meeting attendance expenses)</b> |    |       |    |       |    |        |
| No                                                                                                                                                                                                     | 22 | 20.8% | 17 | 19.1% | 5  | 29.4%  |
| Yes a salary bonus, a set amount if any activity                                                                                                                                                       | 1  | 0.9%  | 1  | 1.1%  | 0  | 0.0%   |
| Yes a salary bonus, a variable amount based on activity                                                                                                                                                | 18 | 17.0% | 16 | 18.0% | 2  | 11.8%  |

|                                                                                                                                                                        |    |       |    |       |    |       |
|------------------------------------------------------------------------------------------------------------------------------------------------------------------------|----|-------|----|-------|----|-------|
| Missing                                                                                                                                                                | 65 | 61.3% | 55 | 61.8% | 10 | 58.8% |
| <b>In the 2021-2022 academic year, did your clinical based FM faculty receive non-financial incentives for engaging in scholarly activities</b>                        |    |       |    |       |    |       |
| No                                                                                                                                                                     | 70 | 66.0% | 61 | 68.5% | 9  | 52.9% |
| Yes                                                                                                                                                                    | 34 | 32.1% | 27 | 30.3% | 7  | 41.2% |
| Missing                                                                                                                                                                | 2  | 1.9%  | 1  | 1.1%  | 1  | 5.9%  |
| <b>What is the most significant limitation your FM clinical faculty face in engaging in scholarly activities?</b>                                                      |    |       |    |       |    |       |
| None                                                                                                                                                                   | 3  | 2.8%  | 3  | 3.4%  | 0  | 0.0%  |
| Research effort support not available                                                                                                                                  | 13 | 12.3% | 12 | 13.5% | 1  | 5.9%  |
| High patient care demands                                                                                                                                              | 47 | 44.3% | 39 | 43.8% | 8  | 47.1% |
| Lack of resources(research expertise, mentoring etc.)                                                                                                                  | 17 | 16.0% | 14 | 15.7% | 3  | 17.6% |
| Lack of interest in scholarship                                                                                                                                        | 15 | 14.2% | 12 | 13.5% | 3  | 17.6% |
| Other                                                                                                                                                                  | 8  | 7.5%  | 8  | 9.0%  | 0  | 0.0%  |
| Missing                                                                                                                                                                | 3  | 2.8%  | 1  | 1.1%  | 2  | 11.8% |
| Source: Analysis of the Fall 2022 Council of Academic Family Medicine Educational Research Alliance Family Medicine Residency Directors Survey. SD: Standard Deviation |    |       |    |       |    |       |

**Supplemental Table 5. Multivariable logistic regression results.**

| <b>Dependent Variable</b>                                   | <b>Unadjusted FI<br/>OR (95% CI)</b> | <b>Unadjusted<br/>FTE<br/>OR (95% CI)</b> | <b>Adjusted<br/>OR (95% CI)</b> | <b>Fully Adjusted^<br/>OR (95% CI)</b> |
|-------------------------------------------------------------|--------------------------------------|-------------------------------------------|---------------------------------|----------------------------------------|
| <b><i>Clinical Review Articles<br/>Greater than Six</i></b> |                                      |                                           |                                 |                                        |
| FI                                                          | 1.8 (0.698-4.6424)                   |                                           | 1.3412 (0.4725-<br>3.8073)      | 1.0841 (0.1843-<br>6.379)              |
| FTE25                                                       |                                      | 0.2075<br>(0.0726-<br>0.5934)             | 0.2252 (0.0758-<br>0.6686)      | 0.1493 (0.0181-<br>1.237)              |
|                                                             |                                      |                                           |                                 |                                        |
| <b><i>Editorials Greater than<br/>Six</i></b>               |                                      |                                           |                                 |                                        |
| FI                                                          | 1.2215 (0.391-3.8158)                |                                           | 1.0836 (0.3152-<br>3.7256)      | 0.1216 (0.0024-<br>6.2597)             |
| FTE25                                                       |                                      | 0.3978<br>(0.1204-1.314)                  | 0.4072 (0.1169-<br>1.418)       | 0.0508 (0.0017-<br>1.6049)             |
|                                                             |                                      |                                           |                                 |                                        |
| <b><i>Research Articles<br/>Greater than Six</i></b>        |                                      |                                           |                                 |                                        |
| FI                                                          | 1.5771 (0.7108-3.4995)               |                                           | 1.1958 (0.5056-<br>2.8283)      | 0.995 (0.2526-<br>3.92)                |
| FTE25                                                       |                                      | 0.4091<br>(0.1813-<br>0.9232)             | 0.4305 (0.1842-<br>1.0058)      | 0.9818 (0.2785-<br>3.4616)             |
|                                                             |                                      |                                           |                                 |                                        |

|                                                                                                                                                                                                                                                                                                                                                                                                                                                                             |                        |                           |                       |                        |
|-----------------------------------------------------------------------------------------------------------------------------------------------------------------------------------------------------------------------------------------------------------------------------------------------------------------------------------------------------------------------------------------------------------------------------------------------------------------------------|------------------------|---------------------------|-----------------------|------------------------|
| <b>Poster Presentations<br/>More than Six</b>                                                                                                                                                                                                                                                                                                                                                                                                                               |                        |                           |                       |                        |
| FI                                                                                                                                                                                                                                                                                                                                                                                                                                                                          | 1.4482 (0.6584-3.1856) |                           | 0.974 (0.4071-2.3302) | 1.1638 (0.3136-4.3196) |
| FTE25                                                                                                                                                                                                                                                                                                                                                                                                                                                                       |                        | 0.3109<br>(0.1361-0.7101) | 0.3084 (0.1294-0.735) | 0.1991 (0.0537-0.739)  |
| <p>^: Adjusted for type of residency program, program location, community size, department chair current tenure, department chair sex, department chair URiM status, department chair Race, and department chair age.</p> <p>Source: Analysis of the Fall 2022 Council of Academic Family Medicine Educational Research Alliance Family Medicine Residency Directors Survey. FI: Financial Incentives, FTE25: Full Time Equivalent &lt; 25, 95% CI: Confidence Interval</p> |                        |                           |                       |                        |
